# Supplementary material
Source: PubMed Central journal article supplement (PMC4060715)
Supplement: 1406402111_pnas.201406402SI.pdf [file 1406402111_pnas.201406402SI.pdf]

# Supporting Information

Hsin and Xie 10.1073/pnas.1406402111

**Table S1. Weighted socio-demographic characteristics**

| Variable                    | Early Childhood Longitudinal Study, Kindergarten Cohort (ECLS-K) |      |           |      | Education Longitudinal Study (ELS) |      |           |      |
|-----------------------------|------------------------------------------------------------------|------|-----------|------|------------------------------------|------|-----------|------|
|                             | Asian                                                            |      | White     |      | Asian                              |      | White     |      |
|                             | Mean or %                                                        | SD   | Mean or % | SD   | Mean or %                          | SD   | Mean or % | SD   |
| Mother's education (% < HS) |                                                                  |      |           |      |                                    |      |           |      |
| % High school graduate      | 17                                                               | —    | 21        | —    | 20                                 | —    | 25        | —    |
| % Some college              | 24                                                               | —    | 36        | —    | 20                                 | —    | 37        | —    |
| % College graduate          | 26                                                               | —    | 24        | —    | 33                                 | —    | 22        | —    |
| % MA or higher              | 14                                                               | —    | 14        | —    | 10                                 | —    | 11        | —    |
| Father's education (% < HS) |                                                                  |      |           |      |                                    |      |           |      |
| % High school graduate      | 12                                                               | —    | 23        | —    | 14                                 | —    | 27        | —    |
| % Some college              | 29                                                               | —    | 36        | —    | 19                                 | —    | 29        | —    |
| % College graduate          | 27                                                               | —    | 21        | —    | 27                                 | —    | 23        | —    |
| % MA or higher              | 21                                                               | —    | 17        | —    | 26                                 | —    | 17        | —    |
| Log family income           | 10.90                                                            | 0.74 | 10.93     | 0.88 | 10.72                              | 1.09 | 11.08     | 0.81 |
| % Female                    | 61                                                               | —    | 49        | —    | 48                                 | —    | 49        | —    |
| % Single parent             | 5                                                                | —    | 15        | —    | 12                                 | —    | 17        | —    |
| Log # books                 | 3.83                                                             | 1.10 | 4.46      | 0.61 | 0.73                               | 0.38 | 0.85      | 0.34 |
| % Children foreign born     | 12                                                               | —    | 2         | —    | 36                                 | —    | 3         | —    |
| % Mother foreign born       | 73                                                               | —    | 5         | —    | 86                                 | —    | 9         | —    |
| N                           | 244                                                              |      | 1,368     |      | 745                                |      | 2,878     |      |

**Table S2. Weighted socio-demographic characteristics by Asian ethnic groups, ELS**

| Variable                    | East Asian |      | Filipino  |      | Southeast Asian |      | South Asian |      |
|-----------------------------|------------|------|-----------|------|-----------------|------|-------------|------|
|                             | Mean or %  | SD   | Mean or % | SD   | Mean or %       | SD   | Mean or %   | SD   |
| Mother's education (% < HS) |            |      |           |      |                 |      |             |      |
| % High school graduate      | 24         | —    | 18        | —    | 20              | —    | 13          | —    |
| % Some college              | 18         | —    | 20        | —    | 18              | —    | 21          | —    |
| % College graduate          | 32         | —    | 49        | —    | 10              | —    | 51          | —    |
| % MA or higher              | 15         | —    | 6         | —    | 5               | —    | 11          | —    |
| Father's education (% < HS) |            |      |           |      |                 |      |             |      |
| % High school graduate      | 15         | —    | 12        | —    | 22              | —    | 4           | —    |
| % Some college              | 16         | —    | 26        | —    | 30              | —    | 6           | —    |
| % College graduate          | 32         | —    | 44        | —    | 10              | —    | 26          | —    |
| % MA or higher              | 29         | —    | 8         | —    | 8               | —    | 58          | —    |
| Log family income           | 10.97      | 0.94 | 10.88     | 0.94 | 10.07           | 1.25 | 10.75       | 0.98 |
| % Female                    | 46         | —    | 51        | —    | 51              | —    | 52          | —    |
| % Single parent             | 14         | —    | 16        | —    | 13              | —    | 6           | —    |
| Log # books                 | 0.76       | 0.38 | 0.71      | 0.37 | 0.63            | 0.39 | 0.79        | 0.37 |
| % Children foreign born     | 38         | —    | 24        | —    | 39              | —    | 44          | —    |
| % Mother foreign born       | 73         | —    | 79        | —    | 88              | —    | 82          | —    |
| N                           | 315        |      | 99        |      | 201             |      | 130         |      |

**Table S3. Decomposition of Asian–white achievement gap**

| Estimates                                      | ECLSK     |      | ELS       |      |            |      |            |      |            |      |
|------------------------------------------------|-----------|------|-----------|------|------------|------|------------|------|------------|------|
|                                                | 8th grade |      | 9th grade |      | 10th grade |      | 11th grade |      | 12th grade |      |
|                                                | Low       | High | Low       | High | Low        | High | Low        | High | Low        | High |
| (1) Unadjusted achievement gap                 | 0.22      |      | 0.29      |      | 0.32       |      | 0.28       |      | 0.23       |      |
| (2) Net of socio-demographics (baseline model) | 0.20      |      | 0.19      |      | 0.27       |      | 0.30       |      | 0.29       |      |
| (3) Net of all factors                         | 0.05      |      | 0.04      |      | 0.14       |      | 0.19       |      | 0.20       |      |
| (4) Gap explained (2) to (3)                   | 0.15      |      | 0.15      |      | 0.13       |      | 0.11       |      | 0.09       |      |
| (5) Percent by cognitive ability               | 9         | 58   | –21       | 12   | 2          | 23   | 2          | 26   | 1          | 25   |
| (6) % by academic effort                       | 42        | 91   | 88        | 121  | 77         | 102  | 74         | 102  | 75         | 101  |

Note: The sample size is 1,612 for the ECLSK and 3,623 for the ELS. All estimates are derived from school-level fixed effect regressions. “Low” indicates lower bound and “high” indicates upper bound estimates of explanatory effects.

**Table S4. Decomposition of achievement gap by Asian ethnic groups ELS, 10th grade**

| Estimates                                      | East  |      | Filipino |       | Southeast |      | South |       |
|------------------------------------------------|-------|------|----------|-------|-----------|------|-------|-------|
|                                                | Low   | High | Low      | High  | Low       | High | Low   | High  |
| (1) Unadjusted achievement gap                 | 0.373 |      | 0.313    |       | 0.213     |      | 0.242 |       |
| (2) Net of socio-demographics (baseline model) | 0.361 |      | 0.246    |       | 0.319     |      | 0.075 |       |
| (3) Net of all factors                         | 0.068 |      | 0.210    |       | 0.126     |      | 0.034 |       |
| (4) Gap explained (2) to (3)                   | 0.293 |      | 0.036    |       | 0.193     |      | 0.041 |       |
| (5) Percent by cognitive ability               | 6%    | 55%  | –125%    | –192% | –16%      | 14%  | –163% | –259% |
| (6) Percent by academic effort                 | 45%   | 94%  | 292%     | 225%  | 86%       | 116% | 359%  | 263%  |

The sample size is 3,623. All estimates are derived from school-level fixed effect regressions. Low, lower bound; high, upper bound estimates of explanatory effects.

**Table S5. Decomposition of Asian–white gap in academic effort ELS, 10th grade**

| Estimates                                                              | Asian American |      | East  |      | Filipino |      | South |      | Southeast |      |
|------------------------------------------------------------------------|----------------|------|-------|------|----------|------|-------|------|-----------|------|
|                                                                        | Low            | High | Low   | High | Low      | High | Low   | High | Low       | High |
| (1) Unadjusted gap in academic effort                                  | 0.35           |      | 0.39  |      | 0.19     |      | 0.50  |      | 0.34      |      |
| (2) Gap net of socio-demographics (baseline model, excluding nativity) | 0.34           |      | 0.38  |      | 0.15     |      | 0.35  |      | 0.47      |      |
| (3) Gap net of all factors                                             | 0.23           |      | 0.31  |      | 0.03     |      | 0.25  |      | 0.36      |      |
| (4) Gap explained (2) to (3)                                           | 0.11           |      | 0.074 |      | 0.112    |      | 0.104 |      | 0.113     |      |
| (5) Percent by cultural orientation                                    | 20%            | 30%  | 10%   | 26%  | 33%      | 40%  | 26%   | 39%  | 32%       | 42%  |
| (6) Percent by immigration status                                      | 69%            | 80%  | 74%   | 90%  | 60%      | 67%  | 61%   | 74%  | 58%       | 68%  |

Sample size is  $n = 2,555$ . Immigration status is measured by dummy variables indicating whether respondent and respondent’s mother are foreign born. Cultural orientation is measured by the variables plotted in Fig. 6. All estimates are derived from school-level fixed effect regressions. Low, lower bound; high, upper bound estimates of explanatory effects.
